# Supplementary material for: A narrow-band blue emitting phosphor Ca8Mg7Si9N22:Eu2+ for pc-LEDs
Source: Royal Society of Chemistry journal article supplement (doi:10.1039/c9tc00855a), 2019-01-01
Supplement: c9tc00855a1.pdf [file c9tc00855a1.pdf]

## Narrow-Band Blue Emitting Phosphor $\text{Ca}_8\text{Mg}_7\text{Si}_9\text{N}_{22}:\text{Eu}^{2+}$ for pc-LEDs

Chao Li,<sup>a</sup> Xiao-Ming Wang,<sup>\*a</sup> Feng-Feng Chi,<sup>cd</sup> Zu-Pei Yang,<sup>ab</sup> and Huan Jiao<sup>\*a</sup>

<sup>a</sup> Key Laboratory of Macromolecular Science of Shaanxi Province, Shaanxi Key Laboratory for Advanced Energy Devices, Shaanxi Engineering Laboratory for Advanced Energy Technology, School of Chemistry & Chemical Engineering, Shaanxi Normal University, Xi'an 710062, Shaanxi Province, P. R. China  
E-mail: xmwang@snnu.edu.cn, jiaohuan@snnu.edu.cn

<sup>b</sup> School of Materials Science and Engineering, Shaanxi Normal University, Xi'an, Shaanxi, P. R. China.

<sup>c</sup> Key Laboratory of Strongly-Coupled Quantum Matter Physics, Chinese Academy of Sciences, School of Physical Sciences, University of Science and Technology of China, No. 96 Jinzhai Road, Hefei, Anhui Province, 230026, P. R. China.

<sup>d</sup> School of Science & New Energy Technology Engineering Laboratory of Jiangsu Province, Nanjing University of Posts and Telecommunications, Nanjing, Jiangsu 210023, P. R. China

### Electronic Supplementary Information (ESI):

#### Experimental section

##### Sample Preparation

$\text{Ca}_8\text{Mg}_7\text{Si}_9\text{N}_{22}:\text{Eu}^{2+}$  phosphors were prepared by a solid state reaction in a gas pressure sintering furnace (ZTQ-45-20, Shanghai chenhua electric furnace co. LTD) under 1 MPa  $\text{N}_2/\text{H}_2$  (90:10) atmosphere. The starting materials include  $\text{Ca}_3\text{N}_2$  (AR), amorphous  $\text{Si}_3\text{N}_4$  (Alfa 95%), Mg powder (AR) and  $\text{EuF}_2$  (Alfa 99.5%). The raw materials were mixed in an agate mortar and filled into tungsten crucibles under argon atmosphere in a glovebox (Beijing Mikrouna Mech.Tech.Co.Ltd,  $\text{O}_2 < 1$  ppm,  $\text{H}_2\text{O} < 1$  ppm). The tungsten crucibles were placed in the gas pressure sintering furnace and heated to 1550 °C with a rate of 400 °C/h, which maintained at that temperature for 6h and then followed by cooling down to 1000 °C at a rate 1 °C/min. After reaction, the furnace cooled to room temperature spontaneously with power switch off and the tungsten crucibles were opened in glovebox.

##### Characterization

X-ray diffraction (XRD) measurements were examined at ambient temperature on a Rigaku MiniFlex600 diffractometer (Japan) using a 0.4 deg min<sup>-1</sup> scan speed, which were operated at 40 kV, 15 mA. The XRD patterns were recorded over the 2θ ranges from 10° to 120° in a step-mode with 0.01° step length. The Rietveld refinement on XRD data was performed by using the software TOPAS 5. Chemical component analyses were performed by a scanning electron microscopy (SEM, FEI Q25) with energy dispersive X-ray spectroscopy (EDX) (EDAX, Element System). The diffuse reflection spectrum was collected by a UV-3600 UV-vis-NIR spectrometer (Shimadzu, Japan) using the white powder  $\text{BaSO}_4$  as a standard material. The PL and photoluminescence excited

(PLE) spectra were measured by powder samples at room temperature using a Hitachi F-4600 fluorescent spectrophotometer (Japan) with a 150 W Xe lamp as excitation source. High temperature PL spectra were investigated between 300K and 700K by using a charge coupled device (CCD) (Andor DU401A-BVF) with the excitation source of an *Opolette*<sup>TM</sup> 355 LD laser, which has a spectral line-width of 4–7 cm<sup>-1</sup> and a pulse duration of 7 ns. The controlling of temperature (300-700K) was realized using a temperature controller (OMRON E5CC-800) with a type-K thermocouple and a heating tube. The luminescence decay curve was measured by using a life time and steady state spectrometer (FLS1000, Edinburgh Instruments Ltd).

#### DFT Calculation

The DFT calculation of Ca<sub>8</sub>Mg<sub>7</sub>Si<sub>9</sub>N<sub>22</sub> was performed with the Cambridge Serial Total Energy Package (CASTEP) code, in which plane wave basis set was chosen for the expansion of valance-electron wave functions at the local density approximation (LDA) level. There are two steps of calculations to obtain the electronic band structure of Ca<sub>8</sub>Mg<sub>7</sub>Si<sub>9</sub>N<sub>22</sub>. The first step was to optimize its crystal structure beginning with the crystallographic data refined from the XRD data by the Broyden-Fletcher-Goldfarb-Shannon (BFGS) method. In order to avoid calculation error, co-occupied Si<sub>2</sub><sub>0.125</sub>/Mg<sub>1</sub><sub>0.875</sub> site were separated by reducing the space group symmetry to P1 (No.1). The second step was to calculate the band structure and density of states (DOS). For the calculations, energy cutoff of plane wave basis set was selected as 340 eV, and K -point sampling was chosen as 2 × 2 × 2 Monkhorst-Pack grid (separation ~0.04 Å<sup>-1</sup>). Criterion for the self-consistent field (SCF) was eigenenergy convergence within 1.0 × 10<sup>-7</sup> eV/atom. Pseudopotential of each atom was constructed from the CASTEP database.

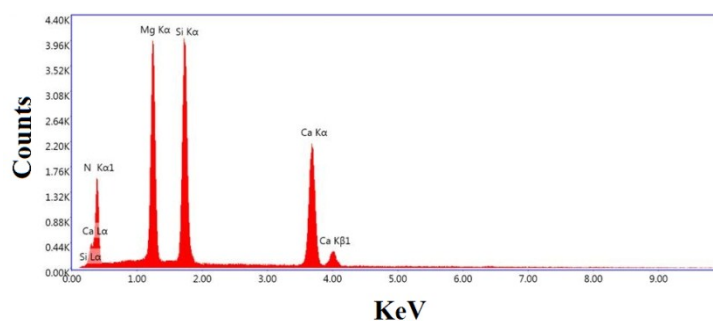

**Fig. S1** The EDX spectrum of Ca<sub>8</sub>Mg<sub>7</sub>Si<sub>9</sub>N<sub>22</sub>.

**Table S1** The EDX Results on Different Particles

| Elements<br>No. | Ca%   | Mg%   | Si%   | N%    |
|-----------------|-------|-------|-------|-------|
| 1               | 15.15 | 15.43 | 15.48 | 53.94 |
| 2               | 16.39 | 16.5  | 15.52 | 51.59 |
| 3               | 14.48 | 15.87 | 14.53 | 55.12 |
| 4               | 14.85 | 16.71 | 15.63 | 52.81 |
| 5               | 15.93 | 16.98 | 15.98 | 51.11 |
| Average         | 15.36 | 16.30 | 15.43 | 52.91 |

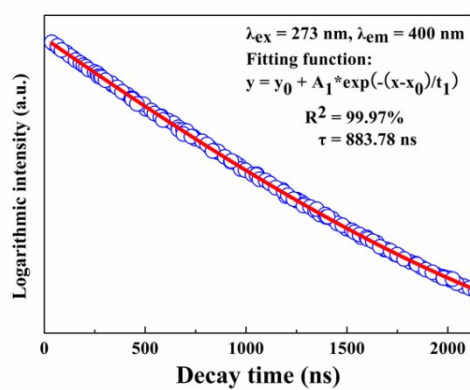

**Fig. S2** The luminescence life decay curves of  $\text{Ca}_{7.95}\text{Mg}_7\text{Si}_9\text{N}_{22}:0.05\text{Eu}^{2+}$  phosphor monitored at  $\lambda_{\text{ex}} = 273 \text{ nm}$  and  $\lambda_{\text{em}} = 400 \text{ nm}$ .

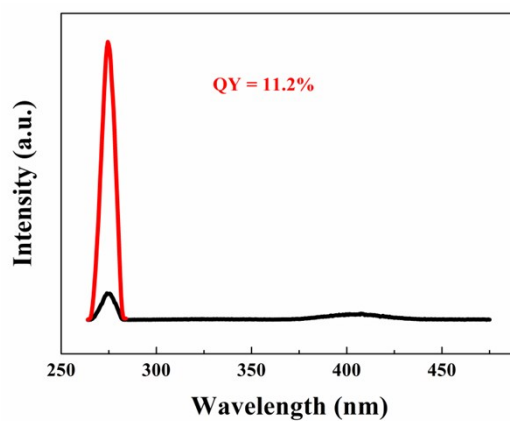

**Fig. S3** The absolute quantum efficiency of the  $\text{Ca}_{7.95}\text{Mg}_7\text{Si}_9\text{N}_{22}:0.05\text{Eu}^{2+}$  phosphors.
